# Supplementary material for: Origin of the extra capacity in nitrogen-doped porous carbon nanofibers for high-performance potassium ion batteries
Source: Royal Society of Chemistry journal article supplement (doi:10.1039/d0ta05626j), 2020-01-01
Supplement: d0ta05626j1.pdf [file d0ta05626j1.pdf]

## Origin of extra capacity in nitrogen-doped porous carbon nanofibers for high-performance potassium ion batteries

Fang Liu<sup>a, b</sup>, Jiashen Meng<sup>a</sup>, Fanjie Xia<sup>a, b</sup>, Ziang Liu<sup>a</sup>, Haoyang Peng<sup>a, b</sup>, Congli Sun<sup>a, b</sup>, Linhan  
Xu<sup>\*, d, e</sup>, Gustaaf Van Tendeloo<sup>b, c</sup>, Liqiang Mai<sup>\*, a</sup>, Jinsong Wu<sup>\*, a, b</sup>

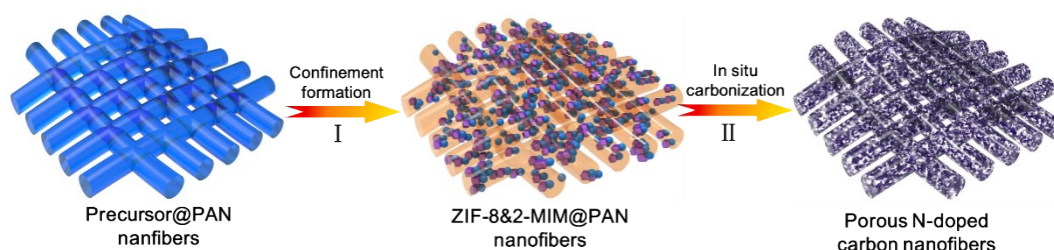

**Figure S1.** Schematic illustration of the formation process of freestanding porous NCNF.

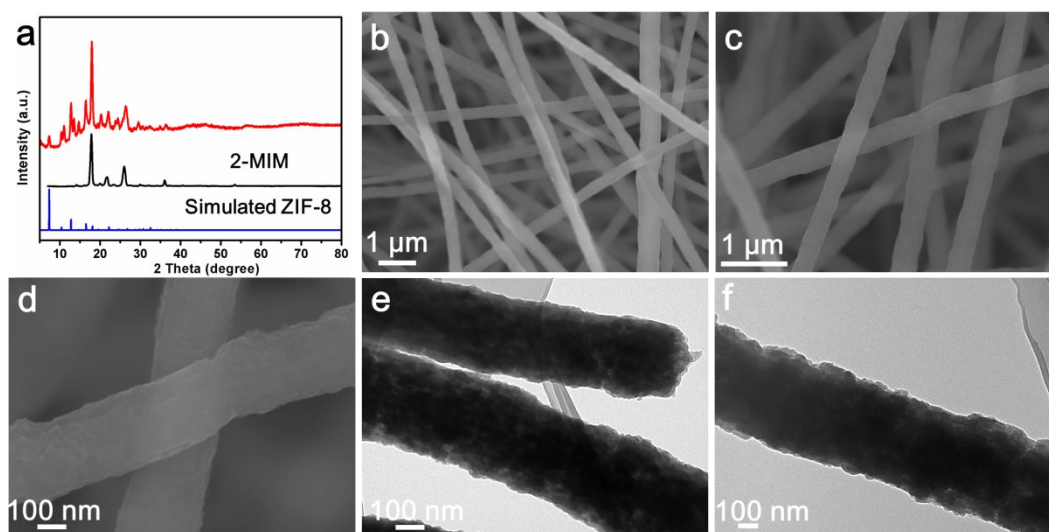

**Figure S2.** (a) XRD patterns of ZIF-8&2-MIM@PAN nanofibers. (b-d) SEM images of ZIF-8&2-MIM@PAN nanofibers. (e, f) TEM images of ZIF-8&2-MIM@PAN nanofibers.

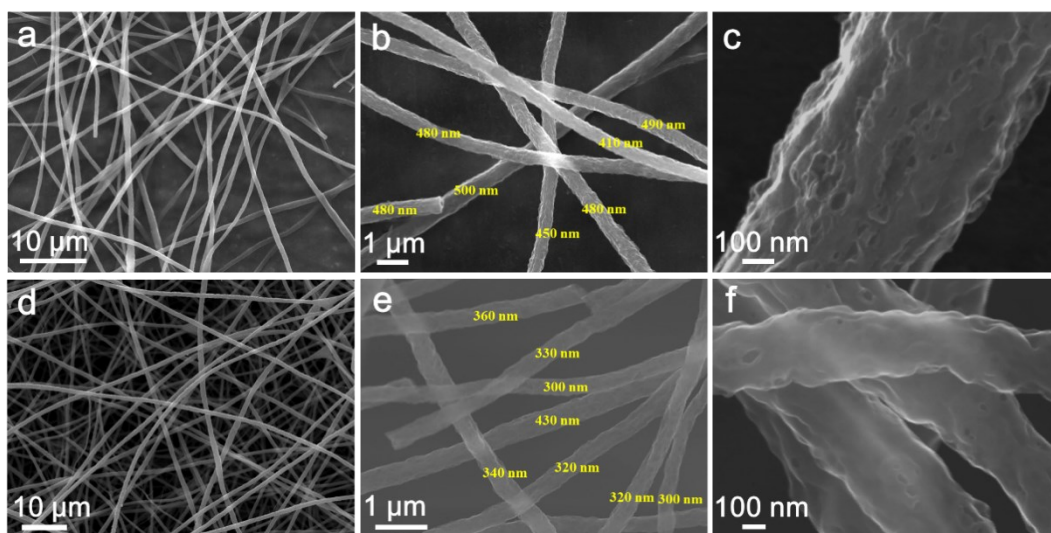

**Figure S3.** (a-c) SEM images of the NCNF-800 sample. (d-f) SEM images of NCNF-1000.

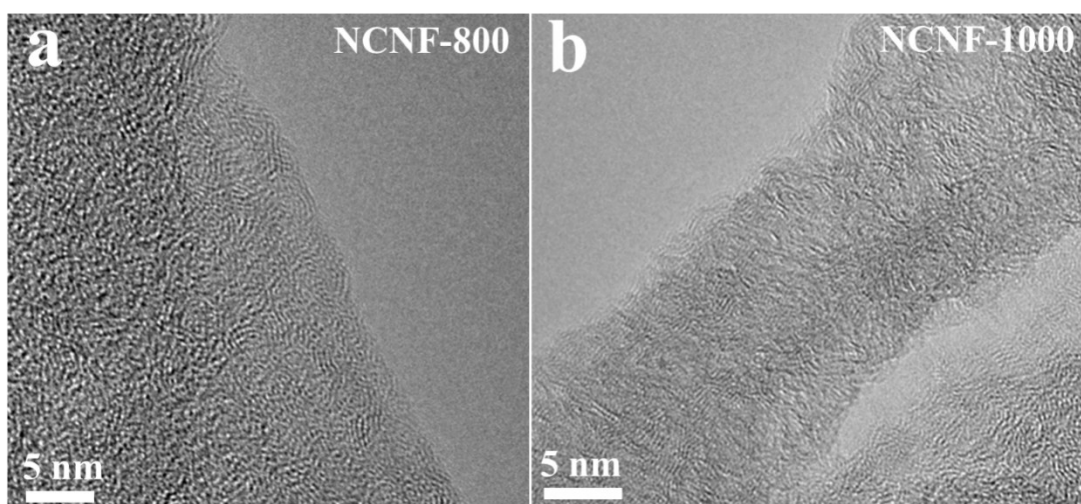

**Figure S4.** (a) HRTEM images of the NCNF-800 sample. (b) HRTEM images of NCNF-1000 sample.

**Table S1.** A summary of Raman results for NCNF-800 and NCNF-1000 samples.

| Temperature (°C) | $I_D$   | $I_G$  | $I_D/I_G$ | Average size of crystalline domains (nm) |
|------------------|---------|--------|-----------|------------------------------------------|
| 800              | 1241360 | 463109 | 2.68      | 14.35696                                 |
| 1000             | 378872  | 157420 | 2.41      | 15.98985                                 |

Tuinstra-Koenig Relation:

$$L_a = (2.4 \times 10^{-10}) \times \lambda^4 \times (I_D / I_G)^{-1}$$

$L_a$  is the average size of the in-plane  $sp^2$ -domains;  $\lambda$  is the laser excitation wavelength (633 nm);  $I_D$  is the intensity of the D-peak;  $I_G$  is the intensity of the G-peak. The smaller the intensity of the D-peak, the larger  $L_a$  and the larger average size of the crystalline domains.

**Table S2.** A summary of the relative contents of C, N and H in NCNF-800 and NCNF-1000 samples.

| Samples   | C (wt%) | N (wt%) | H (wt%) |
|-----------|---------|---------|---------|
| NCNF-800  | 91.6    | 6.9     | 1.6     |
| NCNF-1000 | 97.4    | 1.9     | 0.7     |

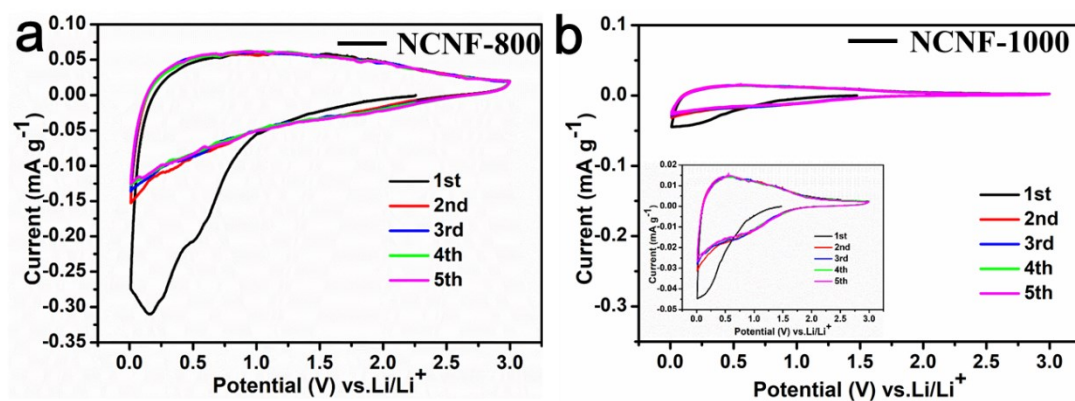

**Figure S5.** (a) First four CV curves of the NCNF-800 sample tested at a scan rate of  $0.2 \text{ mV}\cdot\text{s}^{-1}$  in a potential range from 0.01 to 3.0 V versus  $\text{K}^+/\text{K}$ . (b) First four CV curves of the NCNF-1000 sample tested at a scan rate of  $0.2 \text{ mV}\cdot\text{s}^{-1}$  in a potential range from 0.01 to 3.0 V versus  $\text{K}^+/\text{K}$ . Inset of (b) is magnified CV curves.

**Table S3** A comparison of discharge capacities and the position of the  $\pi^*$ -peak and  $\sigma^*$ -peak for different discharge voltages at 100 mA g<sup>-1</sup> current density between NCNF-800 and NCNF-1000.

| Discharge voltage (V) |                                               | OCV   | 2 | 1.5 | 1     | 0.5   | 0.01  |
|-----------------------|-----------------------------------------------|-------|---|-----|-------|-------|-------|
| NCNF-800              | The discharge capacity (mAh g <sup>-1</sup> ) | 0     | 5 | 30  | 72    | 153   | 280   |
|                       | The position of $\pi^*$ -peak (eV)            | 285.3 | - | -   | 285.3 | 285.3 | 287.4 |
|                       | The position of $\sigma^*$ -peak (eV)         | 291.8 | - | -   | 292.0 | 292.1 | 291.4 |
| NCNF-1000             | The discharge capacity (mAh g <sup>-1</sup> ) |       | 0 | 3   | 28    | 70    | 180   |
|                       | The position of $\pi^*$ -peak (eV)            | 284.8 | - | -   | 285.1 | 285.6 | 286   |
|                       | The position of $\sigma^*$ -peak (eV)         | 291.8 | - | -   | 291.8 | 291.8 | 292.6 |

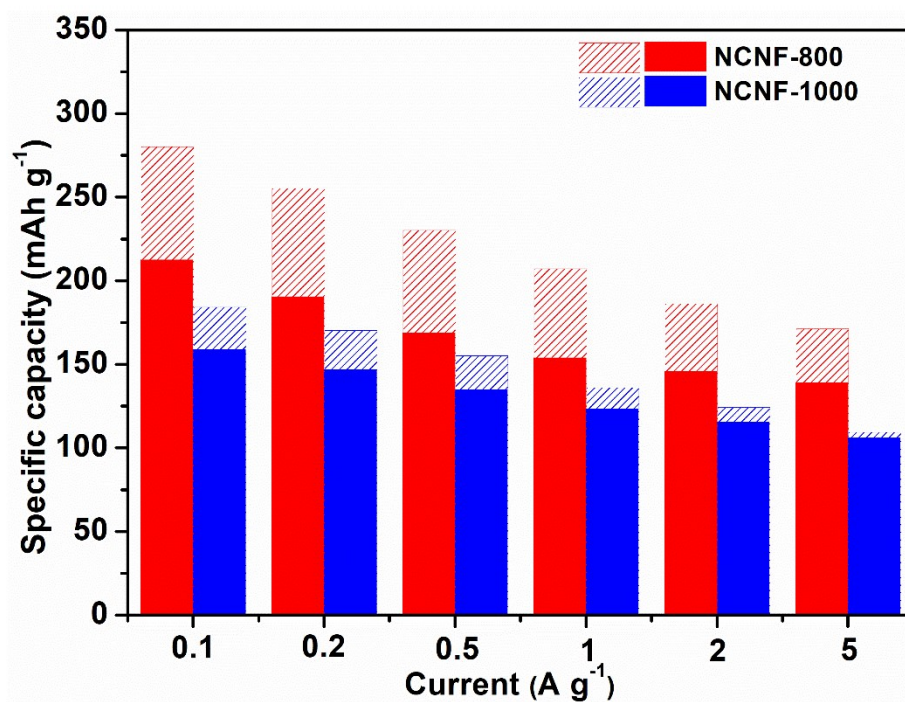

**Figure S6.** Capacity distribution from the high-voltage region (shaded) and from the low-voltage region (solid) for both NCNF-800 and the NCNF-1000 electrodes at different current densities.

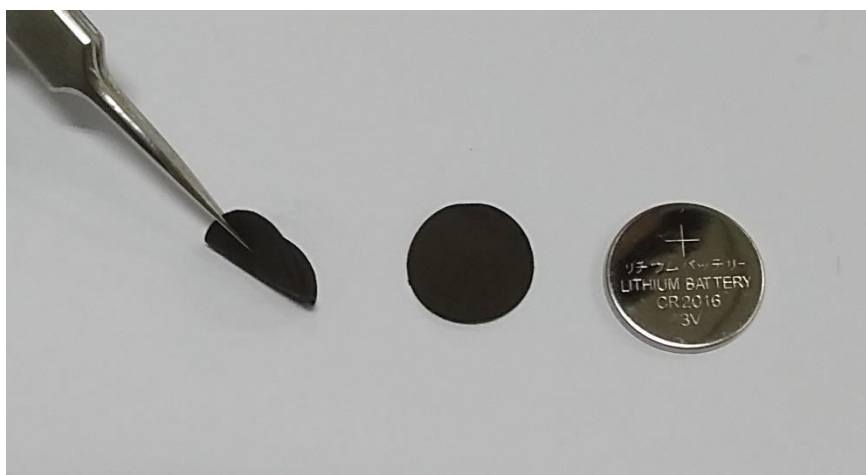

**Figure S7.** The optical image of a freestanding anode based on the NCNT sample.



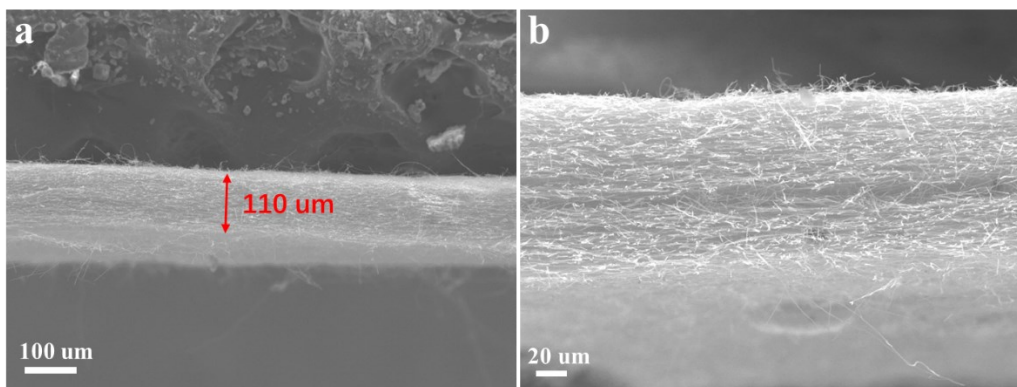

**Figure S8.** The cross-section SEM images of NCNF-800

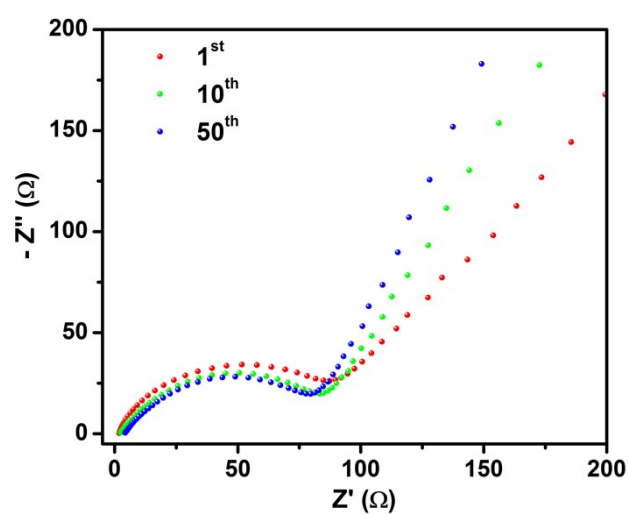

**Figure S9.** The Nyquist plots of NCNF-800 at different cycles.

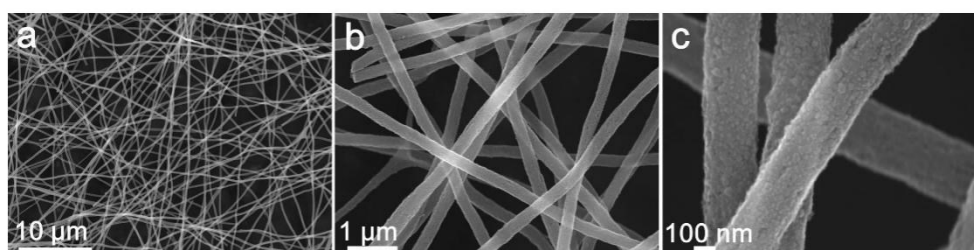

**Figure S10.** (a-c) SEM images of NCNF-800 after 1000 cycles at a current density of 2000 mA·g<sup>-1</sup>.

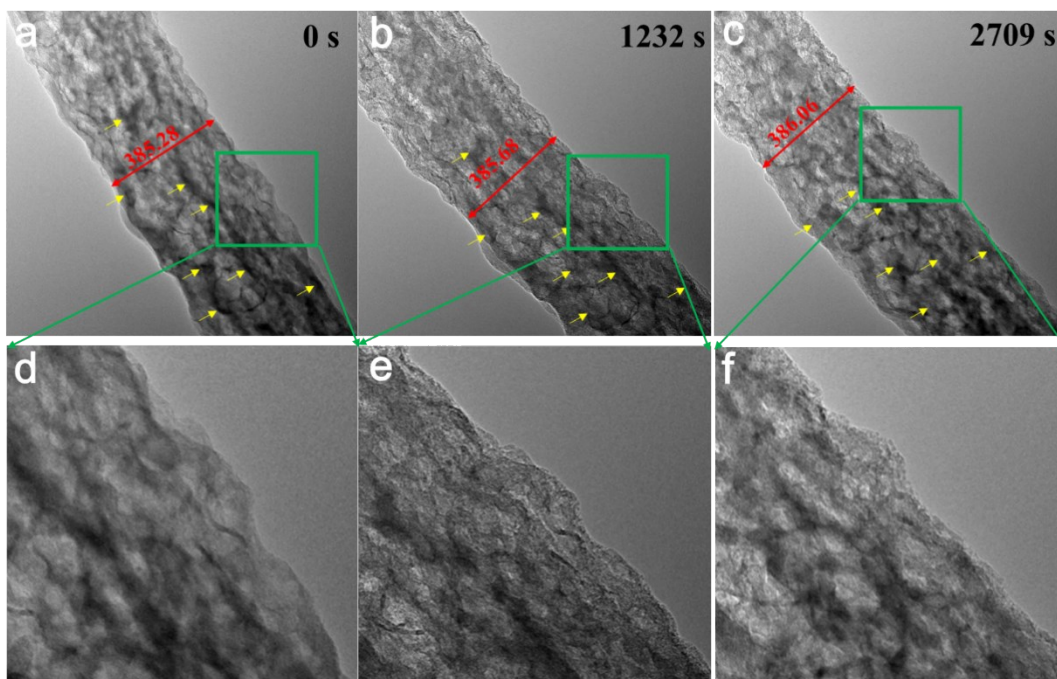

**Figure S11.** (a-c) The morphological evolution of NCNF-800 during the potassiation reaction. (d-e) First four CV curves of NCNF-1000 sample tested at a scan rate of  $0.2 \text{ mV}\cdot\text{s}^{-1}$  in the potential range from 0.01 to 3.0 V versus  $\text{K}^+/\text{K}$ .

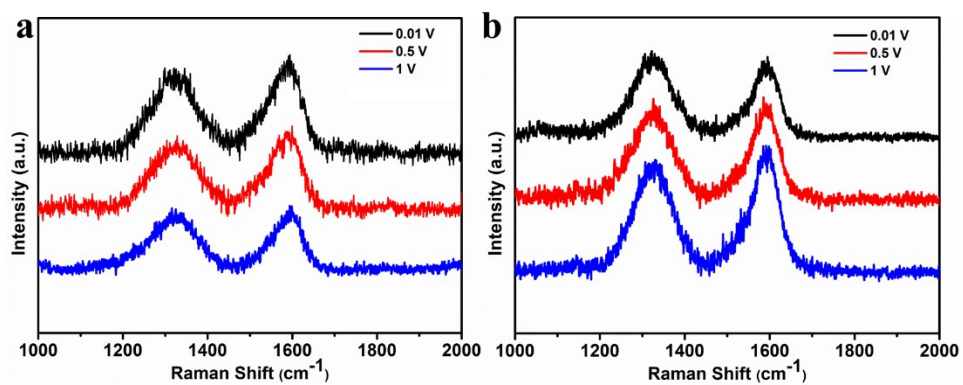

**Figure S12.** Raman spectra of (a) NCNF-800 and (b) NCNF-1000 at different potentials during the discharge process.



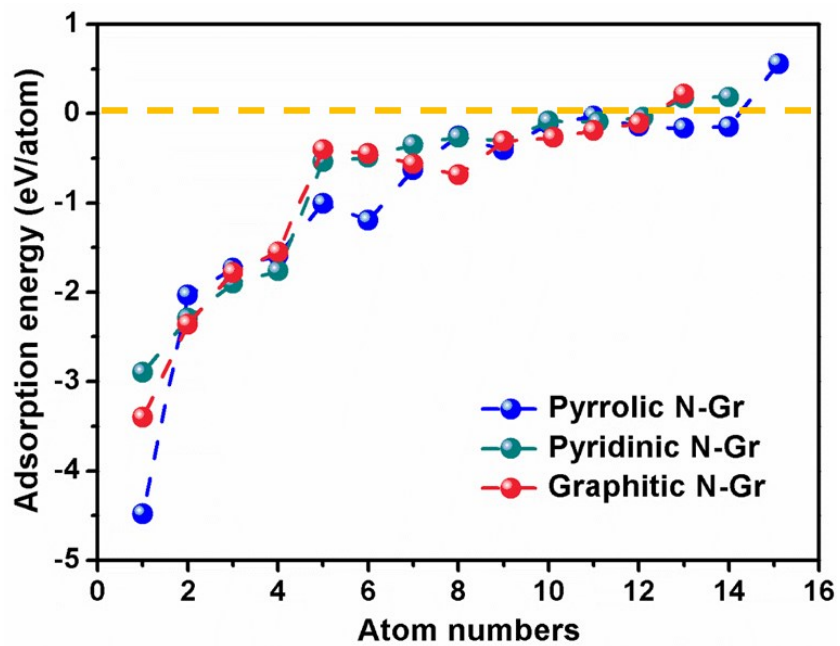

**Figure S13.** The variation of the average adsorption energy along with the number of K atoms for different N-doped graphene.
